# Supplementary material
Source: PubMed Central journal article supplement (PMC8092060)
Supplement: CJN.15360920SupplementaryData.pdf [file CJN.15360920SupplementaryData.pdf]

## SUPPLEMENTAL MATERIAL

Supplemental Table 1A. Incidence Rates for Heart Failure Hospitalization during 1-year of Follow-up, stratified by the baseline heart failure history

Supplemental Table 1B. Incidence rate ratio (95% CI) for heart failure hospitalization during 1-year follow-up period, stratified by the baseline heart failure history

Supplemental Table 2. Incidence rate ratio (95% CI) for heart failure hospitalization during 1-year follow-up period, using 2 definitions of iron deficiency

Supplemental Table 1A. Incidence Rates for Heart Failure Hospitalization during 1-year of Follow-up, stratified by the baseline heart failure history

|                                            | Patients (N) | Time at Risk<br>(Patient-Years) | HF Events<br>(N) | Incidence<br>Rate* | Adjusted<br>Incidence<br>Rate** |
|--------------------------------------------|--------------|---------------------------------|------------------|--------------------|---------------------------------|
| <b>Entire Study Cohort (N=78,551)</b>      |              |                                 |                  |                    |                                 |
| Reference                                  | 38,355       | 32,368                          | 1,518            | 4.7                | 5.1                             |
| Low Iron                                   | 16,335       | 13,391                          | 994              | 7.4                | 6.5                             |
| High Iron                                  | 13,312       | 11,296                          | 372              | 3.3                | 4.1                             |
| Functional Iron Deficiency                 | 10,549       | 8,530                           | 661              | 7.7                | 6.3                             |
| <b>Heart failure cohort (N=18,972)</b>     |              |                                 |                  |                    |                                 |
| Reference                                  | 8,515        | 6,719                           | 1,064            | 15.8               | 15.6                            |
| Low Iron                                   | 4,639        | 3,477                           | 734              | 21.1               | 19.6                            |
| High Iron                                  | 2,591        | 2,058                           | 251              | 12.2               | 12.3                            |
| Functional Iron Deficiency                 | 3,227        | 2,398                           | 489              | 20.4               | 18.8                            |
| <b>Non-heart failure cohort (N=59,579)</b> |              |                                 |                  |                    |                                 |
| Reference                                  | 29,840       | 25,649                          | 454              | 1.8                | 1.8                             |
| Low Iron                                   | 11,696       | 9,914                           | 260              | 2.6                | 2.5                             |
| High Iron                                  | 10,721       | 9,238                           | 121              | 1.3                | 1.5                             |
| Functional Iron Deficiency                 | 7,322        | 6,131                           | 172              | 2.8                | 2.6                             |

\*Incidence Rate refers to heart failure events per 100 patient-years (HF Events/ Time at Risk x 100).

\*\*Adjusted incidence rate reflects the heart failure incident rate per 100 patient-years after applying the matching weights. Patients with previous history of heart failure have higher rates of subsequent heart failure hospitalization, but the association between iron deficiency and higher heart failure risk remains consistent regardless of the heart failure history at baseline.

Supplemental Table 1B. Incidence rate ratio (95% CI) for heart failure hospitalization during 1-year follow-up period, stratified by the baseline heart failure history

|                            | Total study cohort<br>(N=78,551) | History of heart failure<br>at baseline (N=18,972) | No history of heart<br>failure at baseline<br>(N=59,579) |
|----------------------------|----------------------------------|----------------------------------------------------|----------------------------------------------------------|
| Reference                  | REF                              | REF                                                | REF                                                      |
| Low Iron                   | 1.29 (1.19, 1.41)                | 1.26 (1.14, 1.40)                                  | 1.36 (1.15, 1.60)                                        |
| High Iron                  | 0.82 (0.72, 0.92)                | 0.79 (0.68, 0.91)                                  | 0.85 (0.69, 1.05)                                        |
| Functional Iron Deficiency | 1.25 (1.13, 1.37)                | 1.21 (1.07, 1.35)                                  | 1.41 (1.18, 1.70)                                        |

Supplemental Table 2. Incidence rate ratio (95% CI) for heart failure hospitalization during 1-year follow-up period, using conventional definitions of iron deficiency

|                            | <b>Quartile definition</b><br>(as defined in Methods) | <b>Conventional definition</b><br>Low Iron: Transferrin saturation <20% and Ferritin <100<br>Functional iron deficiency: Transferrin saturation <20%<br>and ferritin ≥100 |
|----------------------------|-------------------------------------------------------|---------------------------------------------------------------------------------------------------------------------------------------------------------------------------|
| Reference                  | REF                                                   | REF                                                                                                                                                                       |
| Low Iron                   | 1.29 (1.19, 1.41)                                     | 1.34 (1.23, 1.46)                                                                                                                                                         |
| High Iron                  | 0.82 (0.72, 0.92)                                     | 0.88 (0.78, 1.00)                                                                                                                                                         |
| Functional Iron Deficiency | 1.25 (1.13, 1.37)                                     | 1.29 (1.18, 1.41)                                                                                                                                                         |
